# Supplementary material for: Molecular engineering of quinoxaline dyes toward more efficient sensitizers for dye-sensitized solar cells
Source: Royal Society of Chemistry journal article supplement (doi:10.1039/c5ra00587f), 2015-01-01
Supplement: c5ra00587f1.pdf [file c5ra00587f1.pdf]

**Electronic Supplementary Materials**

**for**

**Molecular engineering of quinoxaline dyes toward more  
efficient sensitizers for dye-sensitized solar cells**

*Li-Na Yang, Shi-Cheng Li, Ze-Sheng Li, Quan-Song Li\**

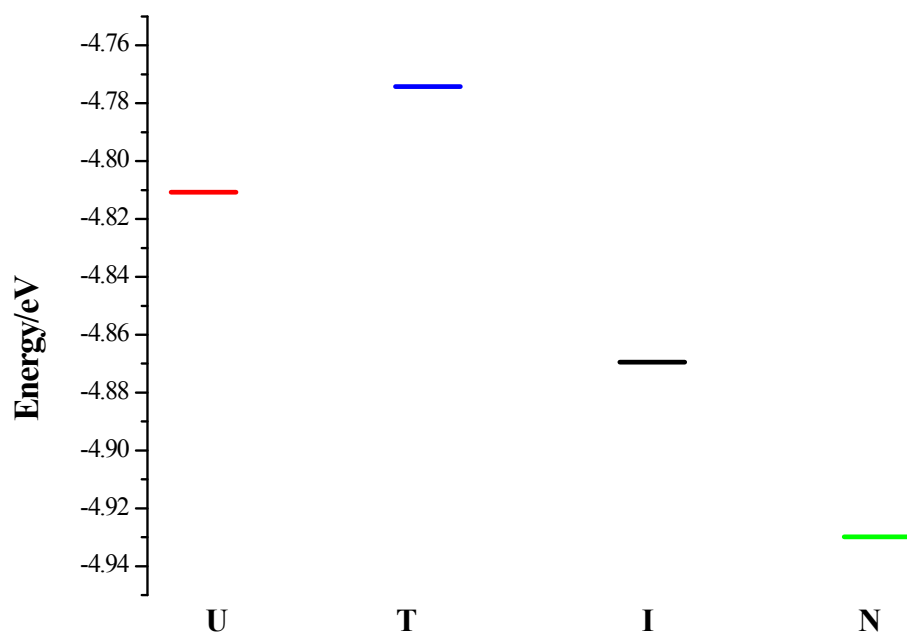

**Fig. S1** The energy levels of HOMOs of different donor groups calculated in the  $\text{CH}_2\text{Cl}_2$  solution. U, T, I and N, represent indoline, triarylamine, ullazine, and N-annulated perylene, respectively.

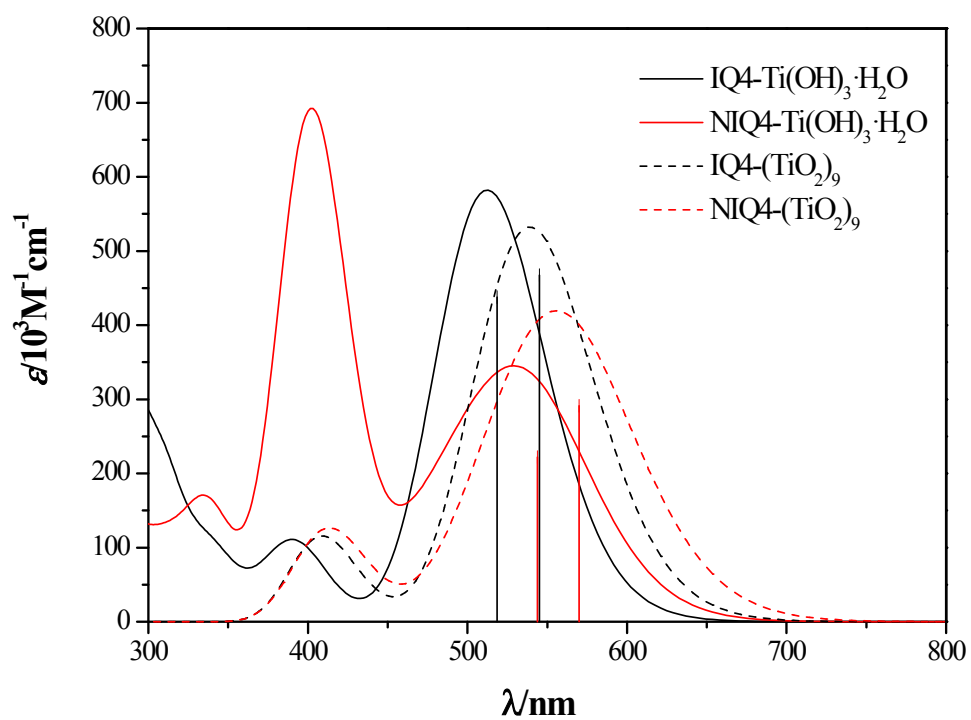

**Fig. S2** The absorption spectra of dye-Ti(OH)<sub>3</sub>·H<sub>2</sub>O (solid line) and dye-(TiO<sub>2</sub>)<sub>9</sub> (dash line) complexes.

**Table S1** Selected geometry parameters for the neutral and oxidized forms of dyes.

| Dye                | Bond length (Å) <sup>a</sup> | Torsional angle (°) <sup>b</sup> |
|--------------------|------------------------------|----------------------------------|
| UIQ4               | 1.49                         | -48.1                            |
| UIQ4 <sup>•+</sup> | 1.49                         | -47.4                            |
| TIQ4               | 1.48                         | 41.0                             |
| TIQ4 <sup>•+</sup> | 1.48                         | 43.3                             |
| IQ4                | 1.47                         | 42.2                             |
| IQ4 <sup>•+</sup>  | 1.47                         | 38.9                             |
| NIQ4               | 1.48                         | -51.0                            |
| NIQ4 <sup>•+</sup> | 1.48                         | -49.3                            |

<sup>a</sup> Bond length between the carbon atom in benzene ring and the carbon atom in quinoxaline unit.

<sup>b</sup> Torsional angle between the donor group and quinoxaline segment.

**Table S2** The calculated maximum absorption wavelengths ( $\lambda_{\max}^{\text{cal}}$ ), oscillator strengths ( $f$ ), transition natures of dye-Ti(OH)<sub>3</sub>·H<sub>2</sub>O and dye-(TiO<sub>2</sub>)<sub>9</sub> complexes (H=HOMO, L=LUMO, etc.).

| System                                     | $\lambda_{\max}^{\text{cal}}/\text{nm}(\text{eV})$ | $f$  | Assignment  |
|--------------------------------------------|----------------------------------------------------|------|-------------|
| IQ4-Ti(OH) <sub>3</sub> ·H <sub>2</sub> O  | 519(2.39)                                          | 1.09 | H→L (77%)   |
| IQ4-(TiO <sub>2</sub> ) <sub>9</sub>       | 545(2.27)                                          | 1.17 | H→L+2 (46%) |
| NIQ4-Ti(OH) <sub>3</sub> ·H <sub>2</sub> O | 544(2.28)                                          | 0.55 | H→L (81%)   |
| NIQ4-(TiO <sub>2</sub> ) <sub>9</sub>      | 570(2.18)                                          | 0.73 | H→L+1(42%)  |

## Cartesian coordinates of the optimized structures

### UIQ4

|   |              |             |             |
|---|--------------|-------------|-------------|
| C | -2.39269300  | -0.93249900 | -1.22925700 |
| C | -2.82172500  | -1.79548500 | -2.22914600 |
| C | -4.18056700  | -2.03230700 | -2.49100100 |
| C | -5.19651500  | -1.41489200 | -1.76552100 |
| C | -4.79208600  | -0.53964100 | -0.70348600 |
| C | -3.40811100  | -0.29160700 | -0.44532300 |
| N | -5.73668900  | 0.02321900  | 0.08731300  |
| C | -5.38257400  | 0.82534800  | 1.07773000  |
| C | -3.98765000  | 1.14570900  | 1.28207500  |
| N | -3.05563500  | 0.56189300  | 0.54946200  |
| C | -3.49825400  | 2.14534100  | 2.27254400  |
| C | -6.48419300  | 1.31761900  | 1.94895800  |
| C | -4.10900200  | 3.40169200  | 2.41477400  |
| C | -3.58572200  | 4.34466900  | 3.29875400  |
| C | -2.45444500  | 4.04330600  | 4.06064300  |
| C | -1.83855000  | 2.79697800  | 3.92326300  |
| C | -2.35031800  | 1.85853300  | 3.02855600  |
| C | -6.38804200  | 1.26589500  | 3.34909800  |
| C | -7.45657700  | 1.67693600  | 4.14434200  |
| C | -8.62836100  | 2.15734700  | 3.55456800  |
| C | -8.73254900  | 2.21175200  | 2.16282600  |
| C | -7.67180200  | 1.78564000  | 1.36467000  |
| C | -6.59447100  | -1.68988100 | -2.10172600 |
| C | -7.03877600  | -2.22167600 | -3.30972800 |
| C | -8.41629900  | -2.46795100 | -3.34400800 |
| C | -9.07246400  | -2.13671500 | -2.16041900 |
| S | -7.93340400  | -1.46335000 | -0.99783700 |
| C | -10.47306600 | -2.31082200 | -1.98011700 |
| C | -11.28456900 | -2.08676200 | -0.89572300 |
| C | -10.80995700 | -1.60624600 | 0.35976000  |
| N | -10.42788900 | -1.22204100 | 1.39128700  |
| H | -2.08315000  | -2.29664800 | -2.84579100 |
| H | -4.43223900  | -2.73275300 | -3.27876700 |
| H | -4.98440600  | 3.64780800  | 1.82342100  |
| H | -4.06136900  | 5.31646300  | 3.39001300  |
| H | -2.05360500  | 4.77626600  | 4.75433200  |
| H | -0.95770400  | 2.55631200  | 4.51091900  |
| H | -1.86739500  | 0.89450300  | 2.90850300  |
| H | -5.48338900  | 0.89038700  | 3.81536400  |
| H | -7.37453600  | 1.61958200  | 5.22546400  |

|   |              |             |             |
|---|--------------|-------------|-------------|
| H | -9.45655900  | 2.48390200  | 4.17619400  |
| H | -9.64134300  | 2.58169500  | 1.69814500  |
| H | -7.75217000  | 1.81707100  | 0.28333900  |
| H | -6.38231800  | -2.40913600 | -4.14955300 |
| H | -8.93773600  | -2.87364800 | -4.20378300 |
| H | -10.98066100 | -2.70016600 | -2.85827300 |
| C | -12.74155200 | -2.34765700 | -0.94081800 |
| O | -13.49491000 | -2.17001900 | 0.00030200  |
| O | -13.16242600 | -2.80671000 | -2.13952500 |
| H | -14.12136800 | -2.94767200 | -2.06584600 |
| C | 3.79943600   | 1.00404800  | -0.41404100 |
| C | 5.16434400   | 0.72278800  | -0.26845100 |
| C | 5.33896200   | -0.67089200 | -0.30831300 |
| C | 4.08276100   | -1.27178400 | -0.46332000 |
| N | 3.15826900   | -0.22923200 | -0.52780100 |
| H | 5.94222100   | 1.46051700  | -0.14233000 |
| H | 6.27766800   | -1.19929500 | -0.23849900 |
| C | 1.80738000   | -0.39388000 | -0.68484300 |
| C | 0.98345500   | 0.75726900  | -0.69951600 |
| C | 1.29943200   | -1.70718800 | -0.82355000 |
| C | -0.39856800  | 0.56304900  | -0.85722900 |
| C | -0.08945800  | -1.84458200 | -0.98603300 |
| C | -0.93915200  | -0.72541500 | -1.00093500 |
| H | -0.50934100  | -2.84150200 | -1.07571400 |
| C | 2.98270900   | 2.18697200  | -0.45041900 |
| C | 1.62052600   | 2.04302900  | -0.57944300 |
| C | 3.58360500   | -2.61477300 | -0.58220000 |
| C | 2.23253600   | -2.80144200 | -0.76512000 |
| H | 0.99368300   | 2.92758200  | -0.63013700 |
| H | 1.83918100   | -3.81060900 | -0.83522300 |
| C | 4.51145900   | -3.77061500 | -0.51271500 |
| C | 5.52283900   | -3.85192800 | 0.45543800  |
| C | 4.37713200   | -4.84881800 | -1.40872000 |
| C | 6.37099800   | -4.95774500 | 0.54014300  |
| H | 5.63911400   | -3.05018300 | 1.17721400  |
| C | 5.21342400   | -5.95368000 | -1.33839800 |
| H | 3.61648300   | -4.80765400 | -2.18232800 |
| C | 6.22033100   | -6.01915500 | -0.36179400 |
| H | 7.13182500   | -4.98335900 | 1.31062400  |
| H | 5.11165100   | -6.77722800 | -2.03774700 |
| C | 3.60380600   | 3.53105500  | -0.35289600 |
| C | 4.75434000   | 3.86712600  | -1.08097600 |
| C | 3.02720700   | 4.53025400  | 0.45477700  |
| C | 5.31601400   | 5.14363500  | -1.01849600 |

|   |             |              |             |
|---|-------------|--------------|-------------|
| H | 5.21081400  | 3.12903800   | -1.73224000 |
| C | 3.57553500  | 5.80287600   | 0.52944500  |
| H | 2.14663200  | 4.29672000   | 1.04544800  |
| C | 4.72733500  | 6.12269200   | -0.20745600 |
| H | 6.19823400  | 5.36209600   | -1.60743900 |
| H | 3.13249500  | 6.56593400   | 1.16124300  |
| O | 5.18974500  | 7.39591700   | -0.06628300 |
| O | 6.98938900  | -7.14279200  | -0.37638400 |
| C | 6.36558900  | 7.78870100   | -0.78727000 |
| C | 6.66331900  | 9.23873900   | -0.43591600 |
| H | 6.19410900  | 7.67526700   | -1.86634300 |
| H | 7.20627700  | 7.13918500   | -0.50803700 |
| C | 7.91114100  | 9.76868000   | -1.15310500 |
| H | 5.79162600  | 9.85151800   | -0.69688900 |
| H | 6.79322100  | 9.31781100   | 0.65052100  |
| H | 8.77427400  | 9.13786500   | -0.89872000 |
| H | 7.77540300  | 9.67782800   | -2.23977200 |
| C | 8.23095100  | 11.22723100  | -0.80397300 |
| C | 9.47806700  | 11.76538200  | -1.51581400 |
| H | 8.36604500  | 11.31837200  | 0.28307600  |
| H | 7.36798900  | 11.85913300  | -1.05750900 |
| C | 9.79409900  | 13.22173700  | -1.16211400 |
| H | 10.33941700 | 11.13209500  | -1.26341400 |
| H | 9.34180000  | 11.67400900  | -2.60199300 |
| H | 10.68875900 | 13.57522000  | -1.68504100 |
| H | 8.96505000  | 13.88444300  | -1.43565300 |
| H | 9.96887500  | 13.33884400  | -0.08646400 |
| C | 8.04191800  | -7.27663700  | 0.58856600  |
| C | 8.72874800  | -8.61067200  | 0.33738500  |
| H | 7.62282800  | -7.23710000  | 1.60316500  |
| H | 8.75101700  | -6.44450000  | 0.48214100  |
| C | 9.88426000  | -8.87156100  | 1.31173600  |
| H | 7.98269300  | -9.41084800  | 0.41859600  |
| H | 9.09911400  | -8.62608700  | -0.69514700 |
| H | 10.62171600 | -8.06089200  | 1.23109000  |
| H | 9.50762200  | -8.84170600  | 2.34362400  |
| C | 10.58010600 | -10.21564700 | 1.06567900  |
| C | 11.73979800 | -10.49014200 | 2.03099500  |
| H | 10.95399700 | -10.24624300 | 0.03245200  |
| H | 9.84200400  | -11.02618200 | 1.14631100  |
| C | 12.42929200 | -11.83419000 | 1.77822800  |
| H | 12.47664400 | -9.67946500  | 1.95011500  |
| H | 11.36570300 | -10.45889900 | 3.06337500  |
| H | 13.25202200 | -12.00013300 | 2.48137600  |



|   |             |              |             |
|---|-------------|--------------|-------------|
| H | 11.72515100 | -12.66700600 | 1.88712100  |
| H | 12.84297000 | -11.88221800 | 0.76440100  |
| H | -1.05205300 | 1.42640000   | -0.87400900 |

## TIQ4

|   |              |             |             |
|---|--------------|-------------|-------------|
| N | -3.66550900  | -0.52320700 | -0.17433600 |
| C | -4.15560500  | 0.81758900  | -0.12819200 |
| C | -5.10511400  | 1.26090000  | -1.05424400 |
| C | -3.71614300  | 1.71044000  | 0.86432600  |
| C | -5.61773000  | 2.55886300  | -0.99862100 |
| H | -5.45411100  | 0.58270500  | -1.82624600 |
| C | -4.20502900  | 3.00854000  | 0.91450300  |
| H | -2.98725900  | 1.38040000  | 1.59737300  |
| C | -5.16462400  | 3.44521800  | -0.01315200 |
| H | -6.35436000  | 2.86601200  | -1.73088500 |
| H | -3.86765700  | 3.69992600  | 1.67993600  |
| C | -4.61183300  | -1.59029100 | -0.25707000 |
| C | -5.69420400  | -1.65362700 | 0.62626300  |
| C | -4.48892000  | -2.58424100 | -1.24297200 |
| C | -6.64121300  | -2.67629900 | 0.53617300  |
| H | -5.80322500  | -0.89192100 | 1.39160100  |
| C | -5.41386200  | -3.61573500 | -1.32666400 |
| H | -3.66100700  | -2.54470300 | -1.94336500 |
| C | -6.50151300  | -3.67095800 | -0.44006700 |
| H | -7.46823300  | -2.69131000 | 1.23542700  |
| H | -5.32070200  | -4.38569100 | -2.08573800 |
| C | -2.28686400  | -0.78806900 | -0.14075700 |
| C | -1.79102100  | -1.99323100 | 0.39655300  |
| C | -1.35389600  | 0.14099700  | -0.64551900 |
| C | -0.42752200  | -2.25238300 | 0.41622100  |
| H | -2.48051900  | -2.71951100 | 0.81120900  |
| C | 0.00821500   | -0.12190900 | -0.60468000 |
| H | -1.70600600  | 1.06684700  | -1.08602000 |
| C | 0.51245300   | -1.32615100 | -0.07611100 |
| H | -0.08099200  | -3.18003500 | 0.86196900  |
| H | 0.69387300   | 0.60457100  | -1.02353900 |
| O | -5.58934200  | 4.73354300  | 0.13179700  |
| O | -7.35632500  | -4.71975100 | -0.61279200 |
| C | -8.47842600  | -4.85041500 | 0.26893700  |
| C | -9.24128400  | -6.10175200 | -0.14010300 |
| H | -9.11779100  | -3.96005900 | 0.19359400  |
| H | -8.12849700  | -4.92820400 | 1.30745900  |
| C | -10.47019400 | -6.35837600 | 0.74077500  |
| H | -9.54664100  | -6.00048500 | -1.18892300 |
| H | -8.55943500  | -6.95975700 | -0.09016000 |
| H | -10.15712600 | -6.44491900 | 1.79055800  |
| H | -11.14398100 | -5.49164000 | 0.69248700  |

|   |              |              |             |
|---|--------------|--------------|-------------|
| C | -11.24027100 | -7.62148600  | 0.33679900  |
| C | -12.47203100 | -7.89274600  | 1.20905800  |
| H | -10.56500100 | -8.48758600  | 0.38386300  |
| H | -11.55188800 | -7.53557600  | -0.71381000 |
| C | -13.23291000 | -9.15767300  | 0.80045700  |
| H | -12.16019600 | -7.97604600  | 2.25905400  |
| H | -13.14720000 | -7.02758000  | 1.16038100  |
| H | -14.10720600 | -9.32235500  | 1.43864800  |
| H | -13.58454600 | -9.09052100  | -0.23546200 |
| H | -12.59412200 | -10.04516100 | 0.87516700  |
| C | -6.56494500  | 5.24507100   | -0.78464200 |
| C | -6.87245700  | 6.67977100   | -0.38175200 |
| H | -7.47241400  | 4.62700900   | -0.74584600 |
| H | -6.17072800  | 5.20211500   | -1.80937600 |
| C | -7.89801400  | 7.34183200   | -1.31019400 |
| H | -7.24378200  | 6.68303900   | 0.65057300  |
| H | -5.93828900  | 7.25486800   | -0.38456200 |
| H | -7.51318800  | 7.34110700   | -2.33947900 |
| H | -8.81825800  | 6.74136800   | -1.32710400 |
| C | -8.24018100  | 8.77880100   | -0.89830100 |
| C | -9.25510300  | 9.45521900   | -1.82781700 |
| H | -7.31911800  | 9.37812100   | -0.87023700 |
| H | -8.63354800  | 8.77726200   | 0.12811800  |
| C | -9.60205100  | 10.88542100  | -1.40350100 |
| H | -8.85754700  | 9.46318900   | -2.85180100 |
| H | -10.17182500 | 8.85094300   | -1.86261200 |
| H | -10.32573900 | 11.34127600  | -2.08711600 |
| H | -10.03635000 | 10.90518400  | -0.39737300 |
| H | -8.70990900  | 11.52204800  | -1.39021200 |
| C | 1.95061000   | -1.65465600  | -0.08033000 |
| C | 2.37657800   | -2.94705000  | -0.37464100 |
| C | 3.72996600   | -3.30898400  | -0.40673300 |
| C | 4.75499400   | -2.39413200  | -0.16570700 |
| C | 4.35893400   | -1.04852300  | 0.13201900  |
| C | 2.97596300   | -0.69259400  | 0.21677700  |
| N | 5.30760000   | -0.09768800  | 0.30815400  |
| C | 4.95956300   | 1.13536800   | 0.63712600  |
| C | 3.57331500   | 1.44116900   | 0.91019800  |
| N | 2.63515100   | 0.54559400   | 0.65404000  |
| C | 3.10792400   | 2.71382200   | 1.52877400  |
| C | 6.05194800   | 2.14417100   | 0.67112400  |
| C | 3.80028500   | 3.31232200   | 2.59425800  |
| C | 3.30501200   | 4.46681700   | 3.19936500  |
| C | 2.11851000   | 5.04655700   | 2.74439300  |

|   |             |             |             |             |
|---|-------------|-------------|-------------|-------------|
| C | 1.42063100  | 4.45617300  | 1.68795000  |             |
| C | 1.90609900  | 3.29385000  | 1.09148300  |             |
| C | 5.89463000  | 3.40580800  | 0.07415800  |             |
| C | 6.94955200  | 4.31677800  | 0.06274500  |             |
| C | 8.16982800  | 3.98686200  | 0.65766500  |             |
| C | 8.33487200  | 2.73436600  | 1.25341200  |             |
| C | 7.28668000  | 1.81516900  | 1.25239700  |             |
| C | 6.14719300  | -2.83408700 | -0.23946900 |             |
| C | 8.63139800  | -3.11636500 | -0.56283000 |             |
| C | 7.95370100  | -4.31586800 | -0.35223200 |             |
| C | 6.57498600  | -4.15902000 | -0.17515000 |             |
| H | 1.63879500  | -3.70077900 | -0.62789700 |             |
| H | 3.97517300  | -4.32887300 | -0.67922800 |             |
| H | 4.71928600  | 2.86729500  | 2.95984800  |             |
| H | 3.84570400  | 4.91152500  | 4.02934800  |             |
| H | 1.73855200  | 5.94974000  | 3.21239200  |             |
| H | 0.49632600  | 4.89962400  | 1.32985100  |             |
| H | 1.35877100  | 2.82511800  | 0.28098200  |             |
| H | 4.95160500  | 3.66805200  | -0.39389500 |             |
| H | 6.81894400  | 5.28389600  | -0.41319500 |             |
| H | 8.98812800  | 4.70055900  | 0.65374400  |             |
| H | 9.28164100  | 2.47044400  | 1.71443000  |             |
| H | 7.41381300  | 0.83786600  | 1.70522100  |             |
| H | 5.90488100  | -4.98762100 | 0.01347100  |             |
| S | 7.50704800  | -1.76088000 | -0.49591400 |             |
| H | 8.46257700  | -5.27306800 | -0.32648200 |             |
| C | 10.03657600 | -3.05259200 | -0.76835900 |             |
| C | 10.87232400 | -1.99459500 | -1.03170800 |             |
| H | 10.52771900 | -4.02040400 | -0.71663300 |             |
| C | 10.42372400 | -0.64914100 | -1.17251300 |             |
| N | 10.06556200 | 0.45245600  | -1.29945600 |             |
| C | 12.33010100 | -2.17524400 | -1.21212200 |             |
| O | 13.10512600 | -1.26674900 | -1.45605400 |             |
| O | 12.72786700 | -3.45972200 | -1.07846000 |             |
| H |             | 13.68997900 | -3.47107700 | -1.21616500 |

## IQ4

|   |              |             |             |
|---|--------------|-------------|-------------|
| C | -7.73549200  | -2.26079300 | 1.55458700  |
| C | -7.17085500  | -3.10357800 | 2.71427100  |
| C | -5.64924500  | -2.97082200 | 2.54887100  |
| C | -5.44109900  | -3.08238400 | 1.01671200  |
| C | -6.74321700  | -2.48813200 | 0.38492500  |
| C | -4.33968500  | -2.24126800 | 0.42196000  |
| C | -4.90511800  | -1.17143400 | -0.30552600 |
| N | -6.29216600  | -1.24365800 | -0.28390500 |
| C | -2.96903800  | -2.38618000 | 0.51519700  |
| C | -2.10234400  | -1.45999300 | -0.11219000 |
| C | -2.68539300  | -0.41111800 | -0.84789800 |
| C | -4.06620700  | -0.25743900 | -0.96090800 |
| C | -7.20011500  | -0.33660500 | -0.86178500 |
| C | -8.39612900  | -0.79932600 | -1.43727300 |
| C | -9.30962200  | 0.09550300  | -1.99133000 |
| C | -9.07232400  | 1.47596600  | -2.00484600 |
| C | -7.88521400  | 1.92993800  | -1.41346000 |
| C | -6.96842200  | 1.05091500  | -0.84208700 |
| C | -10.04731000 | 2.43702100  | -2.64209200 |
| C | -0.64202300  | -1.64879600 | -0.04019900 |
| C | -0.08780200  | -2.92387400 | -0.12399100 |
| C | 1.29322600   | -3.15342800 | -0.07778200 |
| C | 2.22182100   | -2.11826400 | 0.03999600  |
| C | 1.69273700   | -0.78844400 | 0.12780600  |
| C | 0.28055700   | -0.55928400 | 0.12977500  |
| N | 2.54250300   | 0.26515500  | 0.18616300  |
| C | 2.07031800   | 1.49295800  | 0.32697800  |
| C | 0.65277500   | 1.69920000  | 0.51881800  |
| N | -0.18865900  | 0.68992900  | 0.37322700  |
| C | 0.04814500   | 2.99533200  | 0.93577200  |
| C | 3.06310100   | 2.59783000  | 0.24859700  |
| C | 0.63929300   | 3.80095900  | 1.92285400  |
| C | 0.01642000   | 4.97535300  | 2.34348900  |
| C | -1.19920100  | 5.36876000  | 1.77919700  |
| C | -1.79733400  | 4.57157100  | 0.80018800  |
| C | -1.18369400  | 3.38967700  | 0.38881800  |
| C | 2.81507000   | 3.74370600  | -0.52484800 |
| C | 3.77846500   | 4.74557400  | -0.63005100 |
| C | 4.99557200   | 4.62398500  | 0.04508300  |
| C | 5.25076400   | 3.48738700  | 0.81567600  |
| C | 4.29533500   | 2.47645500  | 0.91000700  |
| C | 3.64998800   | -2.42742600 | 0.05530700  |

|   |              |             |             |
|---|--------------|-------------|-------------|
| C | 4.19687100   | -3.68572100 | 0.30321500  |
| C | 5.58922000   | -3.73028400 | 0.18040700  |
| C | 6.16054000   | -2.50789000 | -0.16977200 |
| S | 4.91322300   | -1.26994900 | -0.30883700 |
| C | 7.55974200   | -2.33459300 | -0.34760700 |
| C | 8.30264500   | -1.24195300 | -0.72545000 |
| C | 7.73617500   | 0.02471500  | -1.05080200 |
| N | 7.28267100   | 1.06148600  | -1.32920200 |
| H | -8.76361400  | -2.52575500 | 1.29408800  |
| H | -7.72809200  | -1.19995100 | 1.82735300  |
| H | -7.52917000  | -2.76773300 | 3.69216700  |
| H | -7.46883500  | -4.15325000 | 2.59886100  |
| H | -5.08073600  | -3.72402300 | 3.10203800  |
| H | -5.31978600  | -1.98445700 | 2.89688000  |
| H | -5.33440500  | -4.13753200 | 0.74445100  |
| H | -7.16219400  | -3.17356100 | -0.36086800 |
| H | -2.55364300  | -3.20637100 | 1.09424100  |
| H | -2.04253300  | 0.28584000  | -1.37205100 |
| H | -4.46887400  | 0.54254000  | -1.56939500 |
| H | -8.61412900  | -1.86146700 | -1.45639300 |
| H | -10.22571900 | -0.29370200 | -2.42861200 |
| H | -7.67910900  | 2.99698500  | -1.37953300 |
| H | -6.08505400  | 1.44394900  | -0.35256400 |
| H | -11.05976000 | 2.02358800  | -2.66349900 |
| H | -10.07992500 | 3.38934100  | -2.10373700 |
| H | -9.76584900  | 2.66253600  | -3.67851000 |
| H | -0.74407200  | -3.77495200 | -0.27117600 |
| H | 1.64075800   | -4.17402600 | -0.18831900 |
| H | 1.57963700   | 3.50240600  | 2.37338100  |
| H | 0.48050600   | 5.58163900  | 3.11554300  |
| H | -1.67870300  | 6.28765100  | 2.10297100  |
| H | -2.74361600  | 4.86909700  | 0.35825800  |
| H | -1.65301400  | 2.76077200  | -0.35990600 |
| H | 1.87381300   | 3.84393700  | -1.05512700 |
| H | 3.57918800   | 5.62041800  | -1.24147400 |
| H | 5.74192700   | 5.40884400  | -0.03211600 |
| H | 6.19582200   | 3.38530000  | 1.34006400  |
| H | 4.49275000   | 1.58863000  | 1.50089800  |
| H | 3.60040000   | -4.54428800 | 0.58297500  |
| H | 6.18269900   | -4.62303900 | 0.34336300  |
| H | 8.13750200   | -3.23513800 | -0.15844800 |
| C | 9.77626700   | -1.30186800 | -0.84486000 |
| O | 10.47280100  | -0.36101900 | -1.18469400 |
| O | 10.28656700  | -2.51485000 | -0.53684100 |

H

11.24988200

-2.44991900

-0.64860500

## NIQ4

|   |             |             |             |
|---|-------------|-------------|-------------|
| C | 5.49293900  | -5.24997500 | 1.64814200  |
| C | 4.09675300  | -5.38594000 | 1.79241700  |
| C | 3.23401300  | -4.41981200 | 1.27370400  |
| C | 3.87454200  | -3.31126700 | 0.62306800  |
| C | 5.27875000  | -3.12761000 | 0.48119000  |
| C | 6.08542300  | -4.16402400 | 1.01127700  |
| C | 3.06202000  | -2.33641800 | 0.06363400  |
| C | 3.45074300  | -1.19336500 | -0.62055700 |
| C | 4.84590400  | -0.98826800 | -0.76042500 |
| C | 5.73527700  | -1.92691300 | -0.21894800 |
| C | 1.73970200  | -4.46766200 | 1.33423500  |
| C | 0.97821700  | -3.42262900 | 0.70683700  |
| C | 1.67953300  | -2.38896800 | 0.10535100  |
| C | 0.98673000  | -5.45953700 | 1.96243200  |
| C | -0.42156300 | -5.39166400 | 1.96628000  |
| C | -1.13234000 | -4.37544600 | 1.33587000  |
| C | -0.44197900 | -3.34660700 | 0.64882000  |
| C | -1.02687900 | -2.21566000 | -0.07577000 |
| C | -0.24188600 | -1.19963500 | -0.64528300 |
| C | 1.16588800  | -1.27586300 | -0.54735800 |
| N | 2.27085000  | -0.51955400 | -0.99311400 |
| C | 2.20379200  | 0.74507800  | -1.71928000 |
| C | 7.19223500  | -1.66238300 | -0.38323500 |
| C | 8.07672500  | -1.66148300 | 0.70577900  |
| C | 9.43389300  | -1.37903300 | 0.53760100  |
| C | 9.97311800  | -1.08266200 | -0.72200600 |
| C | 9.08116700  | -1.07817300 | -1.80869500 |
| C | 7.72777000  | -1.36008100 | -1.64742100 |
| C | 2.97213700  | 1.87948500  | -1.05685400 |
| C | 3.65543100  | 2.79449700  | -1.85387400 |
| C | 4.35519000  | 3.87643500  | -1.29006400 |
| C | 4.35977800  | 3.98685200  | 0.10289200  |
| C | 3.68998500  | 3.07405500  | 0.94089100  |
| C | 2.98561500  | 2.02894300  | 0.33750500  |
| C | 11.46393100 | -0.77216300 | -0.94680500 |
| C | 11.60925400 | 0.64751100  | -1.54500100 |
| C | 12.06035400 | -1.80438900 | -1.93341600 |
| C | 12.27677000 | -0.83031100 | 0.36037400  |
| C | 5.09471000  | 4.86811400  | -2.20950500 |
| C | 5.77769200  | 6.00305100  | -1.42365200 |
| C | 4.08703300  | 5.50562700  | -3.19545700 |
| C | 6.18211500  | 4.11137800  | -3.00916000 |



|   |             |             |             |
|---|-------------|-------------|-------------|
| H | 6.13148200  | -6.03255800 | 2.04757700  |
| H | 3.70961600  | -6.26334800 | 2.30132700  |
| H | 7.16474200  | -4.12539100 | 0.91929300  |
| H | 5.24709100  | -0.10915500 | -1.25212900 |
| H | 1.46955100  | -6.28987600 | 2.46830900  |
| H | -0.97459400 | -6.16804100 | 2.48689400  |
| H | -2.21499800 | -4.37792600 | 1.38814500  |
| H | -0.73843800 | -0.39797000 | -1.17872100 |
| H | 1.14346000  | 1.00364200  | -1.80091800 |
| H | 2.57207500  | 0.60214400  | -2.74175700 |
| H | 7.69899000  | -1.86365900 | 1.70345600  |
| H | 10.06956900 | -1.38636500 | 1.41545500  |
| H | 9.44720700  | -0.85776700 | -2.80712100 |
| H | 7.07465000  | -1.36218200 | -2.51537300 |
| H | 3.64439600  | 2.65814800  | -2.93191100 |
| H | 4.90945200  | 4.79828600  | 0.56349100  |
| H | 2.45514000  | 1.30209400  | 0.94110500  |
| H | 11.20291900 | 1.40295300  | -0.86428900 |
| H | 11.08659500 | 0.74103100  | -2.50152900 |
| H | 12.66601000 | 0.87950900  | -1.71798600 |
| H | 11.97719100 | -2.82074400 | -1.53428300 |
| H | 11.55307800 | -1.78138300 | -2.90245400 |
| H | 13.12138700 | -1.59358200 | -2.10723300 |
| H | 12.23721400 | -1.82265800 | 0.82131100  |
| H | 11.92299800 | -0.09834400 | 1.09377100  |
| H | 13.32713800 | -0.60526000 | 0.14972300  |
| H | 6.53758300  | 5.62371000  | -0.73284900 |
| H | 5.05562300  | 6.59201500  | -0.84869100 |
| H | 6.27756300  | 6.68174400  | -2.12208000 |
| H | 3.59698300  | 4.75420100  | -3.82145200 |
| H | 3.30756900  | 6.05579600  | -2.65795800 |
| H | 4.60120500  | 6.20845200  | -3.86034700 |
| H | 5.75424500  | 3.31227800  | -3.62150800 |
| H | 6.91976600  | 3.66092900  | -2.33665300 |
| H | 6.70906100  | 4.80016900  | -3.67873900 |
| C | -2.49326000 | -2.17462200 | -0.30497400 |
| C | -3.16007300 | -3.29035100 | -0.80096000 |
| C | -4.53891500 | -3.29805100 | -1.05301600 |
| C | -5.34150400 | -2.17561900 | -0.85585700 |
| C | -4.69017100 | -0.99829800 | -0.35681200 |
| C | -3.28955800 | -1.00462800 | -0.06125000 |
| N | -5.40192100 | 0.14577600  | -0.21338400 |
| C | -4.81626200 | 1.23910700  | 0.24610200  |
| C | -3.44463500 | 1.18149300  | 0.69998400  |

|   |              |             |             |
|---|--------------|-------------|-------------|
| N | -2.72377500  | 0.09131300  | 0.50654900  |
| C | -2.76934400  | 2.29227000  | 1.42619000  |
| C | -5.62089800  | 2.49038600  | 0.20668100  |
| C | -3.40763600  | 2.98764100  | 2.46570800  |
| C | -2.73382200  | 3.99064700  | 3.16160300  |
| C | -1.42130900  | 4.32453900  | 2.81938100  |
| C | -0.77845300  | 3.63652100  | 1.78724400  |
| C | -1.44273600  | 2.61865400  | 1.10485800  |
| C | -6.97306100  | 2.46785600  | 0.58220300  |
| C | -7.75220500  | 3.62033900  | 0.49265100  |
| C | -7.19607600  | 4.80774900  | 0.01126700  |
| C | -5.85501700  | 4.83621100  | -0.37957600 |
| C | -5.07010600  | 3.68870900  | -0.27802400 |
| C | -6.76818600  | -2.24492000 | -1.17170500 |
| C | -7.38195600  | -3.24274900 | -1.92752300 |
| C | -8.77218500  | -3.11226800 | -2.01158000 |
| C | -9.27417100  | -2.01284800 | -1.31704400 |
| S | -7.95692900  | -1.10613700 | -0.58090900 |
| C | -10.65872700 | -1.69302000 | -1.26859200 |
| C | -11.33876900 | -0.69308100 | -0.61687900 |
| C | -10.70952500 | 0.27678400  | 0.21677700  |
| N | -10.20510500 | 1.06552500  | 0.91060800  |
| H | -2.59586700  | -4.19178800 | -1.01179700 |
| H | -4.98105100  | -4.21908000 | -1.41371900 |
| H | -4.42736200  | 2.73637600  | 2.73774400  |
| H | -3.23528000  | 4.51203900  | 3.97129800  |
| H | -0.90266400  | 5.11437700  | 3.35441700  |
| H | 0.23944000   | 3.89150900  | 1.50908400  |
| H | -0.94201400  | 2.07398200  | 0.31159100  |
| H | -7.41363100  | 1.54726600  | 0.94717000  |
| H | -8.79448800  | 3.57898700  | 0.79188600  |
| H | -7.80401100  | 5.70452100  | -0.06316300 |
| H | -5.41901900  | 5.75200100  | -0.76732500 |
| H | -4.03188500  | 3.71920700  | -0.59098300 |
| H | -6.83418600  | -4.03693200 | -2.41762800 |
| H | -9.41123400  | -3.79221300 | -2.56378700 |
| H | -11.28376800 | -2.37048200 | -1.84377700 |
| C | -12.80928500 | -0.55253800 | -0.71553600 |
| O | -13.45027600 | 0.31509300  | -0.14859400 |
| O | -13.38093300 | -1.48848800 | -1.50415900 |
| H | -14.33694300 | -1.31289900 | -1.50108700 |
| C | 3.79435100   | 3.23347600  | 2.47099700  |
| C | 5.27416200   | 3.05635900  | 2.89077400  |
| H | 5.92098500   | 3.80252500  | 2.41976600  |

|   |            |            |            |            |
|---|------------|------------|------------|------------|
| H | 5.37638100 | 3.16118800 | 3.97666800 |            |
| H | 5.64385400 | 2.06482600 | 2.60905200 |            |
| C | 3.31283200 | 4.64068400 | 2.89553600 |            |
| H | 2.26055300 | 4.79385300 | 2.63433600 |            |
| H | 3.41108600 | 4.76030600 | 3.98008900 |            |
| H | 3.89477100 | 5.43572500 | 2.42091300 |            |
| C | 2.95245500 | 2.18962800 | 3.22920900 |            |
| H | 1.88855000 | 2.26469100 | 2.98218600 |            |
| H | 3.28173200 | 1.16729600 | 3.01772700 |            |
| H |            | 3.05413400 | 2.35086700 | 4.30719600 |

## IQ4-Ti(OH)<sub>3</sub>·H<sub>2</sub>O

|   |              |             |             |
|---|--------------|-------------|-------------|
| C | -9.30377400  | -2.60954700 | 1.40520400  |
| C | -8.70235000  | -3.48356300 | 2.52197800  |
| C | -7.18898200  | -3.28128600 | 2.35368600  |
| C | -6.99116300  | -3.33677300 | 0.81866600  |
| C | -8.31396500  | -2.75504000 | 0.22160300  |
| C | -5.91993400  | -2.44050400 | 0.25496700  |
| C | -6.52219700  | -1.35394400 | -0.41568200 |
| N | -7.90383100  | -1.46679400 | -0.38553200 |
| C | -4.54607700  | -2.54250300 | 0.34563500  |
| C | -3.71426300  | -1.55647800 | -0.23666800 |
| C | -4.33333600  | -0.49831800 | -0.93138400 |
| C | -5.71794800  | -0.38557500 | -1.03606000 |
| C | -8.84613400  | -0.52603100 | -0.83439400 |
| C | -10.06908700 | -0.95710200 | -1.37719400 |
| C | -11.02261300 | -0.03146700 | -1.79709300 |
| C | -10.79875800 | 1.34851100  | -1.70366900 |
| C | -9.58372200  | 1.76892800  | -1.14443400 |
| C | -8.62657800  | 0.85767000  | -0.70494300 |
| C | -11.81740700 | 2.34659800  | -2.19999100 |
| C | -2.25045800  | -1.67327500 | -0.14879500 |
| C | -1.61687400  | -2.91101900 | -0.24777000 |
| C | -0.22519800  | -3.05461800 | -0.17623700 |
| C | 0.63617500   | -1.96399300 | -0.02862600 |
| C | 0.02288900   | -0.67127700 | 0.05525400  |
| C | -1.39991700  | -0.53354900 | 0.05542900  |
| N | 0.80006500   | 0.43586000  | 0.10470700  |
| C | 0.25036900   | 1.63072900  | 0.24590200  |
| C | -1.17400800  | 1.73833300  | 0.47198500  |
| N | -1.94648100  | 0.67653100  | 0.32635900  |
| C | -1.85749100  | 2.98114400  | 0.91900500  |
| C | 1.15902500   | 2.79783900  | 0.12576200  |
| C | -1.27687000  | 3.84315600  | 1.86391300  |
| C | -1.96515700  | 4.97232600  | 2.30566800  |
| C | -3.23786300  | 5.26125000  | 1.80553800  |
| C | -3.82618800  | 4.40465800  | 0.87060800  |
| C | -3.14523300  | 3.26820600  | 0.43685400  |
| C | 0.77081500   | 3.94964100  | -0.57969400 |
| C | 1.65420100   | 5.01760700  | -0.72418600 |
| C | 2.93252200   | 4.95314700  | -0.16137000 |
| C | 3.32823400   | 3.80842300  | 0.53490700  |
| C | 2.45038000   | 2.73427300  | 0.67226100  |
| C | 2.07968800   | -2.17259000 | 0.02771400  |

|   |              |             |             |
|---|--------------|-------------|-------------|
| C | 2.70602700   | -3.40367800 | 0.23381200  |
| C | 4.10096600   | -3.34003100 | 0.19988300  |
| C | 4.59684200   | -2.05653900 | -0.03500300 |
| S | 3.27016900   | -0.90392300 | -0.18700900 |
| C | 5.98229100   | -1.76922700 | -0.10827200 |
| C | 6.66119800   | -0.59886900 | -0.36029000 |
| C | 6.03711700   | 0.65127000  | -0.63236200 |
| N | 5.54632300   | 1.68184300  | -0.86749600 |
| H | -10.32582000 | -2.89061700 | 1.13853700  |
| H | -9.32309800  | -1.56137000 | 1.72286100  |
| H | -9.06801800  | -3.20905900 | 3.51611200  |
| H | -8.95782000  | -4.53771700 | 2.35546100  |
| H | -6.58179000  | -4.02348700 | 2.87974900  |
| H | -6.90124200  | -2.29021200 | 2.72525400  |
| H | -6.85604400  | -4.37749400 | 0.50760800  |
| H | -8.71713700  | -3.41335800 | -0.55645800 |
| H | -4.10422400  | -3.37054000 | 0.89303400  |
| H | -3.71428700  | 0.24052300  | -1.42576900 |
| H | -6.15201600  | 0.42429000  | -1.60920900 |
| H | -10.27652100 | -2.01750100 | -1.47093300 |
| H | -11.96007400 | -0.39378300 | -2.21187300 |
| H | -9.38822600  | 2.83244700  | -1.02969500 |
| H | -7.72039300  | 1.21784600  | -0.23189900 |
| H | -12.82791700 | 1.92725800  | -2.18833900 |
| H | -11.81816900 | 3.25481000  | -1.58887300 |
| H | -11.60288100 | 2.65190700  | -3.23202300 |
| H | -2.21638900  | -3.79863800 | -0.42104600 |
| H | 0.18443500   | -4.05171100 | -0.28847200 |
| H | -0.29035000  | 3.62501100  | 2.25836700  |
| H | -1.50790600  | 5.62546100  | 3.04294900  |
| H | -3.76897700  | 6.14552900  | 2.14527800  |
| H | -4.81641500  | 4.62103500  | 0.48043900  |
| H | -3.60361300  | 2.59117000  | -0.27629400 |
| H | -0.21873300  | 4.00335500  | -1.02084300 |
| H | 1.34619500   | 5.89869200  | -1.27921200 |
| H | 3.61812300   | 5.78822900  | -0.27118400 |
| H | 4.32568900   | 3.74165300  | 0.95621300  |
| H | 2.75718100   | 1.83860300  | 1.20092500  |
| H | 2.16178500   | -4.31956700 | 0.42290800  |
| H | 4.75049200   | -4.19614800 | 0.34577100  |
| H | 6.62808500   | -2.62943800 | 0.05535100  |
| C | 8.12857800   | -0.60424700 | -0.37839600 |
| O | 8.79679600   | 0.44928100  | -0.63235200 |
| O | 8.79341200   | -1.67959800 | -0.13844400 |

|    |             |             |             |            |
|----|-------------|-------------|-------------|------------|
| Ti | 10.59947100 | -0.72144700 | -0.39815800 |            |
| O  | 10.79816900 | -1.31121500 | -2.10230300 |            |
| H  | 11.25124400 | -0.77918200 | -2.77157500 |            |
| O  | 11.66676600 | -1.88481600 | 0.53775900  |            |
| O  | 11.49565500 | 0.86910800  | -0.44185400 |            |
| O  | 10.12855000 | -0.12368700 | 1.81833900  |            |
| H  | 12.05347000 | -2.63696900 | 0.06719400  |            |
| H  | 11.00112100 | 1.66809200  | -0.67788500 |            |
| H  | 10.63168700 | -0.77043600 | 2.33674300  |            |
| H  |             | 10.56756500 | 0.72528600  | 1.97472500 |

## NIQ4-Ti(OH)<sub>3</sub>·H<sub>2</sub>O

|   |             |             |             |
|---|-------------|-------------|-------------|
| C | 7.01237000  | -4.20553400 | 2.04013800  |
| C | 5.66518700  | -4.62218400 | 1.99312200  |
| C | 4.80259100  | -4.13274000 | 1.01160900  |
| C | 5.38999200  | -3.22262300 | 0.06805600  |
| C | 6.71010900  | -2.69587600 | 0.16112300  |
| C | 7.53216500  | -3.25356200 | 1.17033500  |
| C | 4.56952200  | -2.68239500 | -0.91716200 |
| C | 4.87679400  | -1.63047900 | -1.76779700 |
| C | 6.18483800  | -1.09888300 | -1.69086800 |
| C | 7.06976000  | -1.60367100 | -0.73392900 |
| C | 3.32837700  | -4.37856000 | 0.96577200  |
| C | 2.53212100  | -3.68206000 | -0.00812800 |
| C | 3.19083300  | -2.88202800 | -0.93460200 |
| C | 2.61652700  | -5.14220200 | 1.89028500  |
| C | 1.20589000  | -5.16202100 | 1.87056200  |
| C | 0.45618900  | -4.41119500 | 0.97286500  |
| C | 1.10811600  | -3.62473300 | -0.00932700 |
| C | 0.47487700  | -2.69162900 | -0.93282200 |
| C | 1.20913300  | -1.85633900 | -1.78392600 |
| C | 2.61677000  | -1.94266800 | -1.78319300 |
| N | 3.66642600  | -1.17749200 | -2.35226100 |
| C | 3.49429900  | 0.26399100  | -2.63087100 |
| C | 8.34301700  | -0.85872400 | -0.54072300 |
| C | 8.63998600  | -0.27571900 | 0.70035000  |
| C | 9.76854900  | 0.52737200  | 0.86939600  |
| C | 10.65007800 | 0.78521800  | -0.19035600 |
| C | 10.35006200 | 0.19103600  | -1.42886400 |
| C | 9.22340600  | -0.60917000 | -1.60486000 |
| C | 3.96439100  | 1.06010400  | -1.41881000 |
| C | 4.94093200  | 2.04267100  | -1.53687600 |
| C | 5.58092600  | 2.57228900  | -0.39905700 |
| C | 5.18926300  | 2.08968100  | 0.85248300  |
| C | 4.18087200  | 1.11840200  | 1.00497000  |
| C | 3.56861300  | 0.63194500  | -0.14442800 |
| C | 11.88823700 | 1.68475100  | -0.04785300 |
| C | 11.76026000 | 2.88408000  | -1.01657900 |
| C | 13.15707000 | 0.87320600  | -0.39858200 |
| C | 12.04679800 | 2.23822200  | 1.38031000  |
| C | 6.71359100  | 3.59728500  | -0.58019000 |
| C | 7.41334400  | 3.94065300  | 0.74814300  |
| C | 6.12596100  | 4.89391000  | -1.18254200 |
| C | 7.78423300  | 3.01985200  | -1.53631600 |

|   |             |             |             |
|---|-------------|-------------|-------------|
| H | 7.65641500  | -4.62135600 | 2.80963500  |
| H | 5.30870700  | -5.31256500 | 2.75117500  |
| H | 8.56194100  | -2.93048400 | 1.27686300  |
| H | 6.48000900  | -0.23024000 | -2.26706600 |
| H | 3.13322900  | -5.70415900 | 2.66195200  |
| H | 0.68674000  | -5.75866400 | 2.61513000  |
| H | -0.62530100 | -4.41492600 | 1.04799300  |
| H | 0.67746200  | -1.13950800 | -2.39907400 |
| H | 2.43957800  | 0.42861400  | -2.86666700 |
| H | 4.07101600  | 0.53599300  | -3.51915500 |
| H | 7.96277600  | -0.42854600 | 1.53511900  |
| H | 9.94107600  | 0.96484300  | 1.84562400  |
| H | 11.00250100 | 0.35998400  | -2.28025100 |
| H | 9.01655900  | -1.04523900 | -2.57822200 |
| H | 5.25678100  | 2.35148700  | -2.52924300 |
| H | 5.69446200  | 2.45066400  | 1.73943000  |
| H | 2.81123200  | -0.13562000 | -0.06988600 |
| H | 10.87298700 | 3.47956900  | -0.77863300 |
| H | 11.67733700 | 2.55905500  | -2.05795300 |
| H | 12.63996600 | 3.53259800  | -0.93706200 |
| H | 13.26986000 | 0.01744500  | 0.27544800  |
| H | 13.12573200 | 0.49302100  | -1.42398600 |
| H | 14.04848000 | 1.50316100  | -0.30311700 |
| H | 12.16277000 | 1.43570700  | 2.11614900  |
| H | 11.18891600 | 2.85260800  | 1.67329100  |
| H | 12.93989500 | 2.86891100  | 1.43319300  |
| H | 7.86041200  | 3.05080900  | 1.20404700  |
| H | 6.72589200  | 4.39380000  | 1.46983700  |
| H | 8.21863600  | 4.65899800  | 0.56251500  |
| H | 5.64473500  | 4.70452500  | -2.14724400 |
| H | 5.37686000  | 5.32969900  | -0.51242900 |
| H | 6.91685300  | 5.63584400  | -1.34079800 |
| H | 7.37969400  | 2.80826400  | -2.53023600 |
| H | 8.20483600  | 2.09321100  | -1.13675500 |
| H | 8.60178100  | 3.73824000  | -1.66230700 |
| C | -1.00117200 | -2.55498100 | -0.93860500 |
| C | -1.83107400 | -3.64230300 | -1.17787200 |
| C | -3.23053500 | -3.53035700 | -1.18349400 |
| C | -3.88057600 | -2.31487800 | -0.97059200 |
| C | -3.05222200 | -1.17235300 | -0.71036100 |
| C | -1.62932800 | -1.29442800 | -0.67427500 |
| N | -3.62706800 | 0.04095000  | -0.53386700 |
| C | -2.87747000 | 1.09968900  | -0.27923300 |
| C | -1.45057000 | 0.94255100  | -0.09393200 |



|   |              |             |             |
|---|--------------|-------------|-------------|
| N | -0.87141000  | -0.22165800 | -0.32404900 |
| C | -0.56473900  | 2.03644000  | 0.38730800  |
| C | -3.57340600  | 2.41153500  | -0.24554200 |
| C | -0.92730100  | 2.84400600  | 1.47801900  |
| C | -0.06227700  | 3.83718700  | 1.93438900  |
| C | 1.16785800   | 4.04506200  | 1.30118600  |
| C | 1.53782900   | 3.24270400  | 0.21954400  |
| C | 0.67869700   | 2.23949100  | -0.22846200 |
| C | -4.84020300  | 2.51302600  | 0.35107200  |
| C | -5.52849500  | 3.72536700  | 0.34668300  |
| C | -4.96621500  | 4.84853300  | -0.26606300 |
| C | -3.71208400  | 4.75246600  | -0.87635500 |
| C | -3.01679600  | 3.54442800  | -0.86335200 |
| C | -5.34070600  | -2.24869100 | -1.02378200 |
| C | -6.17753500  | -3.22945100 | -1.55740500 |
| C | -7.53952500  | -2.94414800 | -1.41754300 |
| C | -7.79149000  | -1.73753000 | -0.76343800 |
| S | -6.27975400  | -0.93076600 | -0.36168000 |
| C | -9.09859100  | -1.25054200 | -0.50571100 |
| C | -9.53455600  | -0.13060500 | 0.16267300  |
| C | -8.67275800  | 0.81292400  | 0.79075700  |
| N | -7.97505800  | 1.58186700  | 1.31975400  |
| H | -1.38498600  | -4.61292100 | -1.36840600 |
| H | -3.80960100  | -4.43004400 | -1.35555800 |
| H | -1.88284600  | 2.68937100  | 1.96836400  |
| H | -0.34739200  | 4.44885100  | 2.78515000  |
| H | 1.83794700   | 4.82261300  | 1.65592000  |
| H | 2.50054300   | 3.37810500  | -0.26283200 |
| H | 0.96788200   | 1.60221200  | -1.05624700 |
| H | -5.28411800  | 1.64312000  | 0.82086400  |
| H | -6.50522400  | 3.77814400  | 0.81606800  |
| H | -5.50310800  | 5.79272400  | -0.27229300 |
| H | -3.27507600  | 5.61806700  | -1.36536200 |
| H | -2.04555400  | 3.47640600  | -1.34148300 |
| H | -5.80783100  | -4.11965400 | -2.04914200 |
| H | -8.33466000  | -3.58680300 | -1.77903000 |
| H | -9.89841300  | -1.87777500 | -0.89350900 |
| C | -10.97632300 | 0.12700000  | 0.27918100  |
| O | -11.42403800 | 1.13599500  | 0.91206400  |
| O | -11.83547800 | -0.66477300 | -0.25708800 |
| C | 3.84830000   | 0.55414800  | 2.39528900  |
| C | 5.08756500   | -0.21555200 | 2.91399400  |
| H | 5.96099200   | 0.43927400  | 2.99724300  |
| H | 4.88828600   | -0.63870500 | 3.90517100  |

|    |              |             |             |
|----|--------------|-------------|-------------|
| H  | 5.34425400   | -1.03695600 | 2.23614000  |
| C  | 3.49897100   | 1.70347900  | 3.36657100  |
| H  | 2.62513100   | 2.25781800  | 3.01007800  |
| H  | 3.27158100   | 1.30236800  | 4.36049000  |
| H  | 4.32603400   | 2.41137500  | 3.47666700  |
| C  | 2.65709300   | -0.42456900 | 2.35624100  |
| H  | 1.75307500   | 0.05305100  | 1.96355600  |
| H  | 2.87190900   | -1.30635800 | 1.74376300  |
| H  | 2.43818500   | -0.77548400 | 3.36990400  |
| Ti | -13.42399100 | 0.46081500  | 0.42820400  |
| O  | -13.72171500 | -0.62910900 | 1.84773500  |
| H  | -14.06976700 | -0.28543000 | 2.68264200  |
| O  | -14.69222400 | -0.10571500 | -0.77040700 |
| O  | -14.00386000 | 2.07086000  | 1.06257400  |
| O  | -12.84622600 | 1.67594700  | -1.48725300 |
| H  | -15.20951100 | -0.89579900 | -0.55839600 |
| H  | -13.37357700 | 2.64793400  | 1.51897300  |
| H  | -13.48191400 | 1.36429100  | -2.14980900 |
| H  | -13.07960000 | 2.60152700  | -1.32436700 |
